# Supplementary material for: Folic acid and methotrexate use and their association with COVID-19 diagnosis and mortality: a case–control analysis from the UK Biobank
Source: PubMed Central journal article supplement — BMJ Open. 2022 Aug 24;12(8):e062945. doi: 10.1136/bmjopen-2022-062945 (PMC9412040; doi:10.1136/bmjopen-2022-062945), 2022-08-24
Supplement: bmjopen-2022-062945supp001.pdf [file bmjopen-2022-062945supp001.pdf]

Table S1. Medications co-prescribed with folic acid on &gt;5% of occasions

| Medication/Supplement | Number of prescriptions* | Percentage of folic acid prescriptions |
|-----------------------|--------------------------|----------------------------------------|
| Folic acid            | 177,918                  | 100.00                                 |
| Methotrexate          | 45,697                   | 25.68                                  |
| Atorvastatin          | 41,296                   | 23.21                                  |
| Lansoprazole          | 35,611                   | 20.02                                  |
| Omeprazole            | 32,909                   | 18.50                                  |
| Bisoprolol            | 26,445                   | 14.86                                  |
| Levothyroxine         | 25,482                   | 14.32                                  |
| Ramipril              | 21,990                   | 12.36                                  |
| Aspirin               | 21,696                   | 12.19                                  |
| Paracetamol           | 20,830                   | 11.71                                  |
| Amlodipine            | 18,354                   | 10.32                                  |
| Simvastatin           | 16,878                   | 9.49                                   |
| Amitriptyline         | 13,573                   | 7.63                                   |
| Furosemide            | 12,983                   | 7.30                                   |
| Metformin             | 11,460                   | 6.44                                   |
| Hydroxychloroquine    | 11,038                   | 6.20                                   |
| Clopidogrel           | 10,918                   | 6.14                                   |
| Prednisolone          | 10,475                   | 5.89                                   |
| Alendronic acid       | 10,198                   | 5.73                                   |

\*General practice prescription data from 1st of January 2019 through to 27<sup>th</sup> September 2021

Table S2. COVID-19 diagnosis in people prescribed methotrexate and / or folic acid in the UKBB, compared to people not prescribed methotrexate or folic acid

|                                                     | <i>Unadjusted</i>      |          | <i>Model 1</i>          |          | <i>Model 2</i>          |          |
|-----------------------------------------------------|------------------------|----------|-------------------------|----------|-------------------------|----------|
|                                                     | OR<br>[95% CI]         | <i>P</i> | OR<br>[95% CI]          | <i>P</i> | OR<br>[95% CI]          | <i>P</i> |
| Prescribed folic acid only <sup>1</sup>             | 1.58<br>[1.49 ; 1.68 ] | <0.001   | 1.60<br>[ 1.5 ; 1.7 ]   | <0.001   | 1.51<br>[ 1.42 ; 1.61 ] | <0.001   |
| Prescribed methotrexate only <sup>1</sup>           | 0.94<br>[0.51 ; 1.72]  | 0.83     | 0.89<br>[ 0.48 ; 1.65 ] | 0.72     | 0.86<br>[ 0.47 ; 1.6 ]  | 0.64     |
| Prescribed methotrexate and folic acid <sup>1</sup> | 1.09<br>[0.96 ; 1.23]  | 0.18     | 1.15<br>[ 1.02 ; 1.3 ]  | 0.021    | 1.09<br>[ 0.96 ; 1.23 ] | 0.18     |
| 60-70 years of age <sup>2</sup>                     |                        |          | 0.60<br>[ 0.58 ; 0.62 ] | <0.001   | 0.59<br>[ 0.57 ; 0.61 ] | <0.001   |
| 70-75 years of age <sup>2</sup>                     |                        |          | 0.41<br>[ 0.4 ; 0.43 ]  | <0.001   | 0.40<br>[ 0.38 ; 0.41 ] | <0.001   |
| >75 years of age <sup>2</sup>                       |                        |          | 0.40<br>[ 0.38 ; 0.41 ] | <0.001   | 0.38<br>[ 0.37 ; 0.4 ]  | <0.001   |
| Male sex                                            |                        |          | 1.09<br>[ 1.07 ; 1.12 ] | <0.001   | 1.09<br>[ 1.06 ; 1.12 ] | <0.001   |
| Former smoker <sup>3</sup>                          |                        |          | 0.87<br>[ 0.84 ; 0.92 ] | <0.001   | 0.87<br>[ 0.83 ; 0.91 ] | <0.001   |
| Never smoked <sup>3</sup>                           |                        |          | 0.88<br>[ 0.86 ; 0.91 ] | <0.001   | 0.89<br>[ 0.86 ; 0.91 ] | <0.001   |
| BMI                                                 |                        |          | 1.03<br>[ 1.03 ; 1.03 ] | <0.001   | 1.03<br>[ 1.03 ; 1.03 ] | <0.001   |
| Asian British <sup>4</sup>                          |                        |          | 1.38<br>[ 1.29 ; 1.48 ] | <0.001   | 1.33<br>[ 1.25 ; 1.43 ] | <0.001   |
| Black British <sup>4</sup>                          |                        |          | 1.08<br>[ 1 ; 1.17 ]    | 0.057    | 1.08<br>[ 1 ; 1.18 ]    | 0.058    |
| Other ethnicity <sup>4</sup>                        |                        |          | 1.05<br>[ 0.95 ; 1.15 ] | 0.35     | 1.04<br>[ 0.95 ; 1.15 ] | 0.40     |
| Townsend deprivation index                          |                        |          | 1.03<br>[ 1.02 ; 1.03 ] | <0.001   | 1.03<br>[ 1.02 ; 1.03 ] | <0.001   |
| Rheumatoid arthritis                                |                        |          |                         |          | 1.4<br>[ 1.12 ; 1.74 ]  | 0.003    |
| Sickle cell disease                                 |                        |          |                         |          | 1.00<br>[ 0.74 ; 1.35 ] | 1.00     |
| Prescribed anticonvulsant medication                |                        |          |                         |          | 1.07<br>[ 0.89 ; 1.29 ] | 0.48     |
| Prescribed statins                                  |                        |          |                         |          | 1.08<br>[ 1.05 ; 1.12 ] | <0.001   |
| Prescribed iron supplements                         |                        |          |                         |          | 1.29<br>[ 1.22 ; 1.36 ] | <0.001   |

1 Compared to Prescribed neither methotrexate nor folic acid; 2 Compared to <60 years of age; Compared to Current smoker; 4 Compared to White British; Model 1 and Model 2 contain all variables with odds ratios present (and comparative groups) as respectively listed below the titles.

Table S3. Sex-specific associations between prescription of methotrexate, folic acid, and the combination of both with the risk of COVID-19

|                                        | COVID-19 diagnosis - Male  |          |                            |          |                            |                 | COVID-19 diagnosis -Female |          |                            |          |                            |          |
|----------------------------------------|----------------------------|----------|----------------------------|----------|----------------------------|-----------------|----------------------------|----------|----------------------------|----------|----------------------------|----------|
|                                        | <i>Unadjusted</i>          |          | <i>Model 1</i>             |          | <i>Model 2</i>             |                 | <i>Unadjusted</i>          |          | <i>Model 1</i>             |          | <i>Model 2</i>             |          |
|                                        | OR,<br>[95% CI]            | <i>P</i> | OR,<br>[95% CI]            | <i>P</i> | OR,<br>[95% CI]            | OR,<br>[95% CI] | OR,<br>[95% CI]            | <i>P</i> | OR,<br>[95% CI]            | <i>P</i> | OR,<br>[95% CI]            | <i>P</i> |
| Neither folic acid<br>nor methotrexate | 1.0                        | -        | 1.0                        | -        | 1.0                        | -               | 1.0                        | -        | 1.0                        | -        | 1.0                        | -        |
| Folic acid only                        | 1.52<br>[ 1.39 ;<br>1.66 ] | <0.001   | 1.57<br>[ 1.44 ;<br>1.72 ] | <0.001   | 1.50<br>[ 1.37 ;<br>1.64 ] | <0.001          | 1.64<br>[ 1.51 ;<br>1.77 ] | <0.001   | 1.61<br>[ 1.48 ;<br>1.75 ] | <0.001   | 1.52<br>[ 1.39 ;<br>1.65 ] | <0.001   |
| Methotrexate<br>only                   | 0.96<br>[ 0.39 ;<br>2.38 ] | 0.93     | 0.93<br>[ 0.37 ;<br>2.32 ] | 0.88     | 0.92<br>[ 0.37 ;<br>2.30 ] | 0.86            | 0.92<br>[ 0.4 ;<br>2.11 ]  | 0.85     | 0.87<br>[ 0.38 ;<br>1.99 ] | 0.74     | 0.83<br>[ 0.36 ;<br>1.90 ] | 0.65     |
| Methotrexate<br>and folic acid         | 1.08<br>[ 0.89 ;<br>1.31 ] | 0.45     | 1.15<br>[ 0.94 ;<br>1.40 ] | 0.17     | 1.11<br>[ 0.91 ;<br>1.36 ] | 0.29            | 1.11<br>[ 0.95 ;<br>1.29 ] | 0.19     | 1.16<br>[ 0.99 ;<br>1.36 ] | 0.060    | 1.07<br>[ 0.91 ;<br>1.26 ] | 0.38     |

diagnosis

Model 1 adjusted for age group, sex, ethnicity, Townsend deprivation index, BMI, smoking status

Model 2 is model 1 plus adjustment by the presence of rheumatoid arthritis, sickle cell disease, use of statins, anticonvulsants and iron supplementation.

Table S4. The association of prescription of methotrexate and folic acid with COVID-19-related death in the UK Biobank.

|                                                     | <i>Unadjusted</i>     |          | <i>Model 1</i>           |          | <i>Model 2</i>            |          |
|-----------------------------------------------------|-----------------------|----------|--------------------------|----------|---------------------------|----------|
|                                                     | OR<br>[95% CI]        | <i>P</i> | OR<br>[95% CI]           | <i>P</i> | OR<br>[95% CI]            | <i>P</i> |
| Prescribed folic acid only <sup>1</sup>             | 1.47<br>[0.81 ; 0.67] | 0.21     | 2.91<br>[ 2.38 ; 3.55 ]  | <0.001   | 2.64<br>[ 2.15 ; 3.24 ]   | <0.001   |
| Prescribed methotrexate only <sup>1</sup>           | N/A                   | N/A      | N/A                      | N/A      | N/A                       | N/A      |
| Prescribed methotrexate and folic acid <sup>1</sup> | 5.14<br>[4.23 ; 6.24] | <0.001   | 1.26<br>[ 0.7 ; 2.3 ]    | 0.44     | 1.07<br>[ 0.57 ; 1.98 ]   | 0.84     |
| 60-70 years of age <sup>2</sup>                     |                       |          | 3.05<br>[ 2 ; 4.65 ]     | <0.001   | 2.98<br>[ 1.95 ; 4.56 ]   | <0.001   |
| 70-75 years of age <sup>2</sup>                     |                       |          | 5.70<br>[ 3.76 ; 8.64 ]  | <0.001   | 5.46<br>[ 3.59 ; 8.31 ]   | <0.001   |
| >75 years of age <sup>2</sup>                       |                       |          | 14.7<br>[ 9.86 ; 21.91 ] | <0.001   | 13.87<br>[ 9.26 ; 20.78 ] | <0.001   |
| Male sex                                            |                       |          | 2.13<br>[ 1.84 ; 2.46 ]  | <0.001   | 2.13<br>[ 1.84 ; 2.47 ]   | <0.001   |
| Former smoker <sup>3</sup>                          |                       |          | 1.37<br>[ 1.11 ; 1.7 ]   | 0.004    | 1.37<br>[ 1.11 ; 1.7 ]    | 0.004    |
| Never smoked <sup>3</sup>                           |                       |          | 0.76<br>[ 0.65 ; 0.89 ]  | <0.001   | 0.77<br>[ 0.66 ; 0.89 ]   | 0.001    |
| BMI                                                 |                       |          | 1.09<br>[ 1.08 ; 1.11 ]  | <0.001   | 1.09<br>[ 1.08 ; 1.11 ]   | <0.001   |
| Asian British <sup>4</sup>                          |                       |          | 2.48<br>[ 1.76 ; 3.49 ]  | <0.001   | 2.33<br>[ 1.65 ; 3.29 ]   | <0.001   |
| Black British <sup>4</sup>                          |                       |          | 1.74<br>[ 1.15 ; 2.63 ]  | <0.001   | 1.72<br>[ 1.13 ; 2.63 ]   | 0.012    |
| Other ethnicity <sup>4</sup>                        |                       |          | 1.44<br>[ 0.86 ; 2.42 ]  | 0.16     | 1.44<br>[ 0.86 ; 2.41 ]   | 0.17     |
| Townsend deprivation index                          |                       |          | 1.09<br>[ 1.07 ; 1.11 ]  | <0.001   | 1.08<br>[ 1.06 ; 1.11 ]   | <0.001   |
| Rheumatoid arthritis                                |                       |          |                          |          | 2.48<br>[ 1.19 ; 5.17 ]   | 0.015    |
| Sickle cell disease                                 |                       |          |                          |          | 1.22<br>[ 0.29 ; 5.15 ]   | 0.78     |
| Prescribed anticonvulsant medication                |                       |          |                          |          | 2.22<br>[ 1.18 ; 4.17 ]   | 0.014    |
| Prescribed statins                                  |                       |          |                          |          | 1.08<br>[ 0.93 ; 1.25 ]   | 0.33     |
| Prescribed iron supplements                         |                       |          |                          |          | 1.44<br>[ 1.16 ; 1.79 ]   | 0.001    |

1 Compared to Prescribed neither methotrexate nor folic acid; 2 Compared to <60 years of age; Compared to Current smoker; 4 Compared to White British; N/A = not applicable due to no deaths in the methotrexate only group. Model 1 and Model 2 contain all variables with odds ratios present (and comparative groups) as respectively listed below the titles.

Table S5. Sex-specific associations between prescription of methotrexate, folic acid, and the combination of both with the risk of COVID-19 related mortality.

|                                     | COVID-19 related death – Male |          |                     |          |                     |              | COVID-19 related death - Female |              |                     |              |                     |        |
|-------------------------------------|-------------------------------|----------|---------------------|----------|---------------------|--------------|---------------------------------|--------------|---------------------|--------------|---------------------|--------|
|                                     | <i>Unadjusted</i>             |          | <i>Model 1</i>      |          | <i>Model 2</i>      |              | <i>Unadjusted</i>               |              | <i>Model 1</i>      |              | <i>Model 2</i>      |        |
|                                     | OR, [95% CI]                  | <i>P</i> | OR, [95% CI]        | <i>P</i> | OR, [95% CI]        | OR, [95% CI] | <i>P</i>                        | OR, [95% CI] | <i>P</i>            | OR, [95% CI] | <i>P</i>            |        |
| Neither folic acid nor methotrexate | 1.0                           | -        | 1.0                 | -        | 1.0                 | -            | 1.0                             | -            | 1.0                 | -            | 1.0                 | -      |
| Folic acid only                     | 4.73<br>[3.71;6.04]           | <0.001   | 2.83<br>[2.20;3.64] | <0.001   | 2.59<br>[2.00;3.36] | <0.001       | 5.67<br>[4.10;7.82]             | <0.001       | 3.07<br>[2.20;4.28] | <0.001       | 2.72<br>[1.93;3.84] | <0.001 |
| Methotrexate and folic acid         | 2.00<br>[0.99;4.03]           | 0.053    | 1.62<br>[0.80;3.26] | 0.18     | 1.54<br>[0.75;3.15] | 0.24         | 1.01<br>[0.32;3.16]             | 0.99         | 0.80<br>[0.25;2.50] | 0.70         | 0.56<br>[0.17;1.84] | 0.34   |

Model 1 adjusted for age group, sex, ethnicity, Townsend deprivation index, BMI, smoking status

Model 2 is model 1 plus adjustment by the presence of rheumatoid arthritis, sickle cell disease, use of statins, anticonvulsants and iron supplementation.

Table S6. Risk of death related to COVID-19 in the COVID-19-positive group

|                                     | <i>Unadjusted</i>       |          | <i>Model 1</i>          |          | <i>Model 2</i>          |          |
|-------------------------------------|-------------------------|----------|-------------------------|----------|-------------------------|----------|
|                                     | OR<br>[95% CI]          | <i>P</i> | OR<br>[95% CI]          | <i>P</i> | OR<br>[95% CI]          | <i>P</i> |
| Neither folic acid nor methotrexate | 1.0                     | -        | 1.0                     | -        | 1.0                     | -        |
| Folic acid only                     | 3.58 [ 2.93 ;<br>4.39 ] | <0.001   | 1.82 [ 1.47 ;<br>2.26 ] | <0.001   | 1.46 [ 1.16 ;<br>1.83 ] | 0.0011   |
| Methotrexate and folic acid         | 1.37 [ 0.75 ;<br>2.52 ] | 0.31     | 1.03 [ 0.55 ;<br>1.91 ] | 0.94     | 0.96 [ 0.50 ;<br>1.83 ] | 0.90     |

Model 2 additionally adjusted by quarterly categorical time variable.

A total of 25,816 COVID-19-positive cases were analyzed. 217 COVID-19-positive cases who were diagnosed after 13<sup>th</sup> September 2021 (28 days before the last recorded death) were removed from the cohort given the unknown outcome in these individuals
